# Supplementary material for: Hybridization of Cd0.2Zn0.8S with g-C3N4nanosheets: a visible-light-driven photocatalyst for H2evolution from water and degradation of organic pollutants
Source: Royal Society of Chemistry journal article supplement (doi:10.1039/c5dt01364j), 2015-01-01
Supplement: c5dt01364j1.pdf [file c5dt01364j1.pdf]

## Supporting Information

### Hybridization of $\text{Cd}_{0.2}\text{Zn}_{0.8}\text{S}$ with $\text{g-C}_3\text{N}_4$ nanosheets: a visible-light-driven photocatalyst for $\text{H}_2$ evolution from water and degradation of organic pollutants

Hong Liu\*, Zhitong Jin and Zhengzheng Xu

Department of Chemical Engineering, School of Environmental and Chemical Engineering, Shanghai University, 99 Shangda Road, Shanghai 200444, P R China

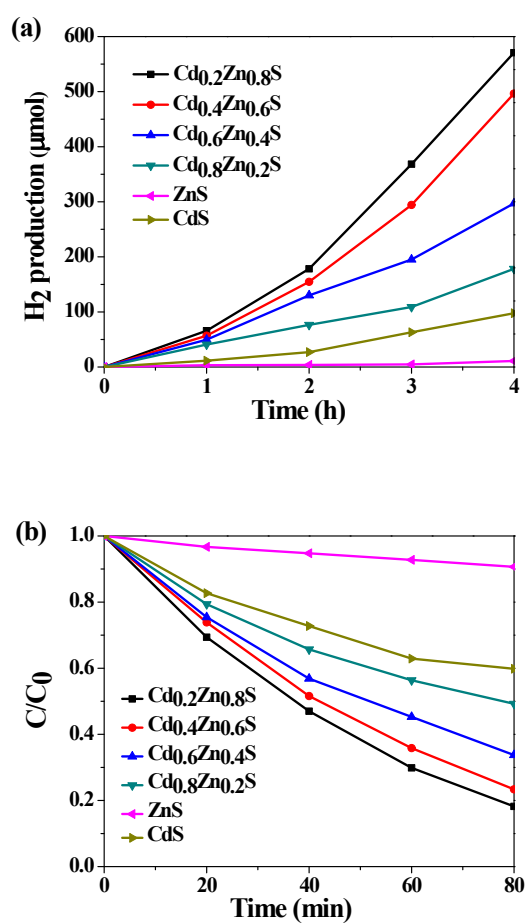

**Fig. S1** (a)  $\text{H}_2$ -production and (b) photodegradation activity of  $\text{Cd}_x\text{Zn}_{1-x}\text{S}$  solid solutions with different  $x$  value
